# Supplementary material for: Ultrathin and Flexible CNTs/MXene/Cellulose Nanofibrils Composite Paper for Electromagnetic Interference Shielding
Source: PubMed Central journal article supplement (PMC7770921; doi:10.1007/s40820-019-0304-y), 2019-09-07
Supplement: 40820_2019_304_MOESM1_ESM.pdf [file 40820_2019_304_MOESM1_ESM.pdf]

Supporting Information for

## Ultrathin and Flexible CNTs/MXene/Cellulose Nanofibrils Composite Paper for Electromagnetic Interference Shielding

Wentao Cao<sup>1,2</sup>, Chang Ma<sup>2</sup>, Shuo Tan<sup>1</sup>, Mingguo Ma<sup>2,\*</sup>, Pengbo Wan<sup>3,\*</sup>, Feng Chen<sup>1,\*</sup>

<sup>1</sup>Department of Orthopedics, Shanghai Tenth People's Hospital, Tongji University School of Medicine, Shanghai 200072, People's Republic of China

<sup>2</sup>Engineering Research Center of Forestry Biomass Materials and Bioenergy, Beijing Key Laboratory of Lignocellulosic Chemistry, College of Materials Science and Technology, Beijing Forestry University, Beijing 100083, People's Republic of China

<sup>3</sup>Center of Advanced Elastomer Materials, State Key Laboratory of Organic-Inorganic Composites, Beijing University of Chemical Technology, Beijing 100029, People's Republic of China

\*Corresponding authors. E-mail: mg\_ma@bjfu.edu.cn (Mingguo Ma); pbwan@mail.buct.edu.cn (Pengbo Wan); fchen@tongji.edu.cn (Feng Chen)

### Supplementary Figures and Tables

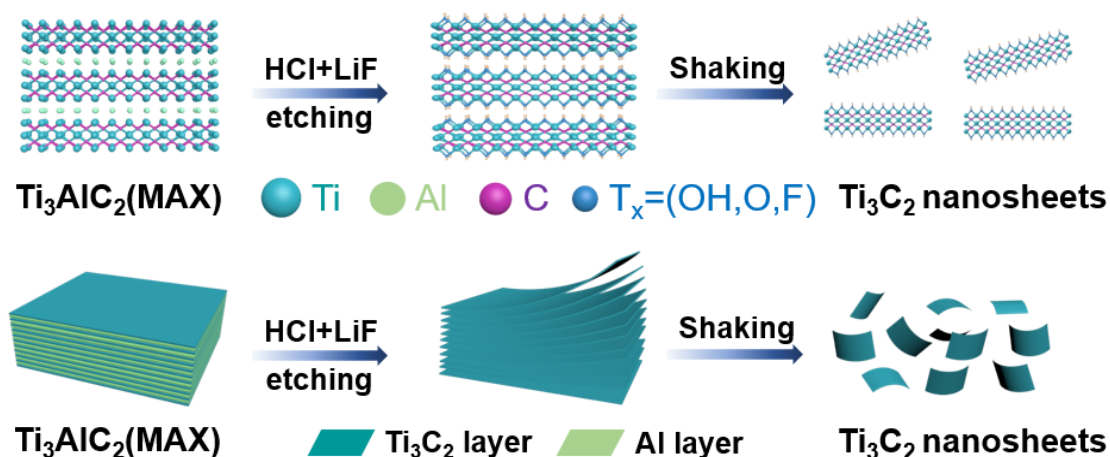

Fig. S1 Schematic illustration of the preparation of  $\text{Ti}_3\text{C}_2$  nanosheets

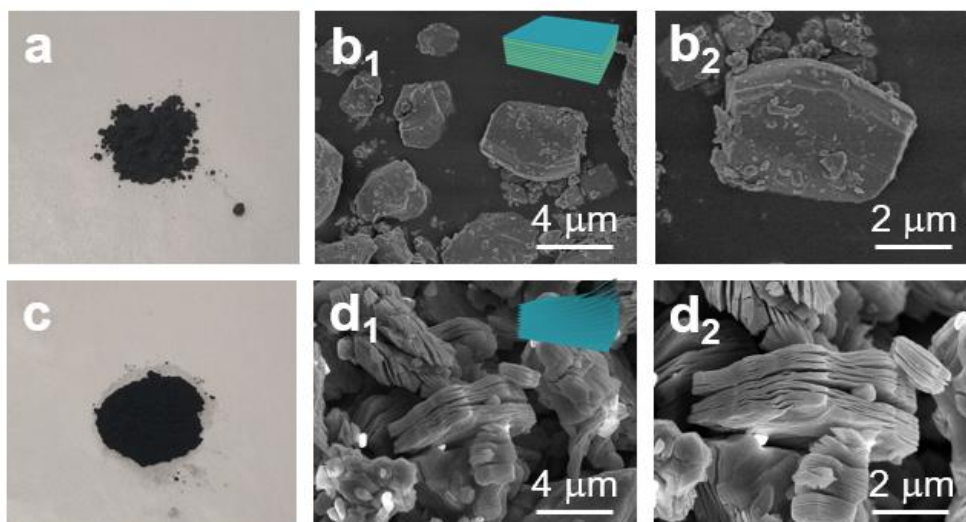

**Fig. S2** a Digital image and b SEM images of Ti<sub>3</sub>AlC<sub>2</sub> precursor (MAX phase). c Digital image and d SEM images of multilayered Ti<sub>3</sub>C<sub>2</sub> MXene

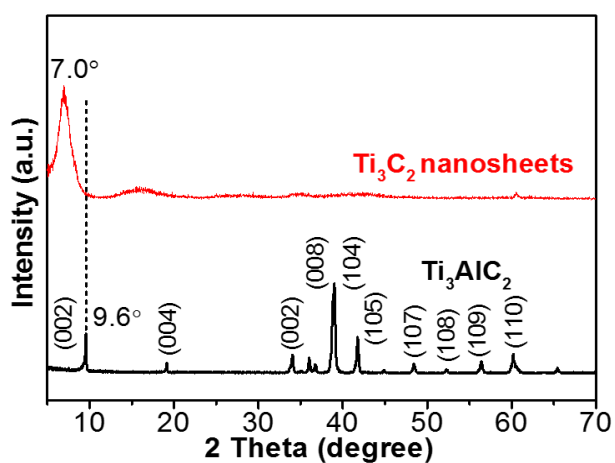

**Fig. S3** XRD patterns of Ti<sub>3</sub>AlC<sub>2</sub> precursor and Ti<sub>3</sub>C<sub>2</sub> nanosheets

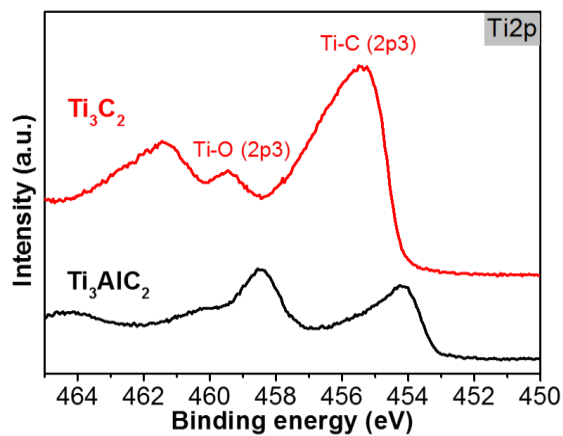

**Fig. S4** Ti 2p spectra of Ti<sub>3</sub>AlC<sub>2</sub> precursor and Ti<sub>3</sub>C<sub>2</sub> nanosheets

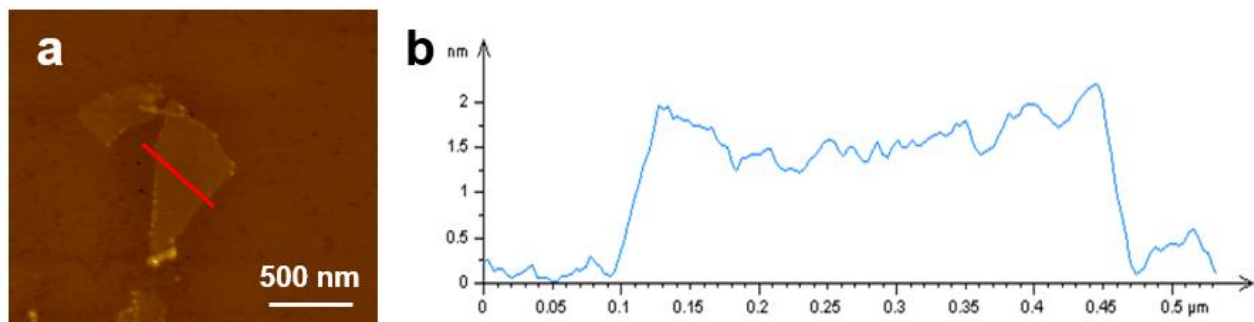

**Fig. S5** a AFM image, and b height cutaway view of Ti<sub>3</sub>C<sub>2</sub> nanosheets

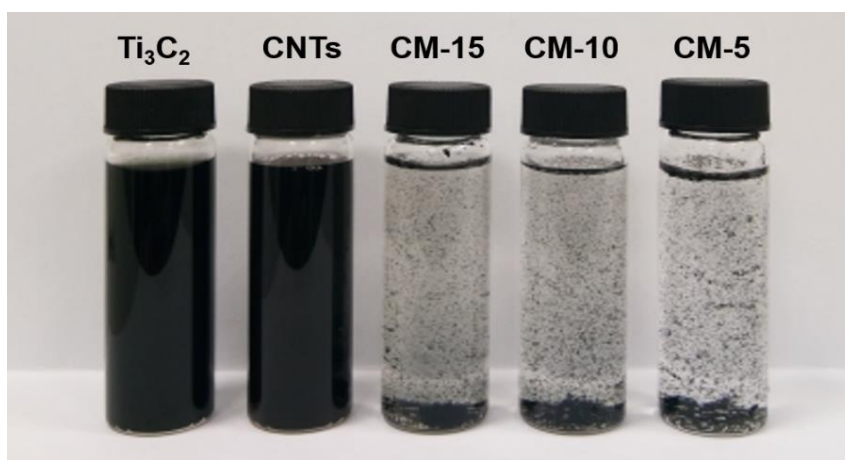

**Fig. S6** Digital photographs of Ti<sub>3</sub>C<sub>2</sub> suspension, CNTs aqueous dispersion, and CM composites with various Ti<sub>3</sub>C<sub>2</sub> content

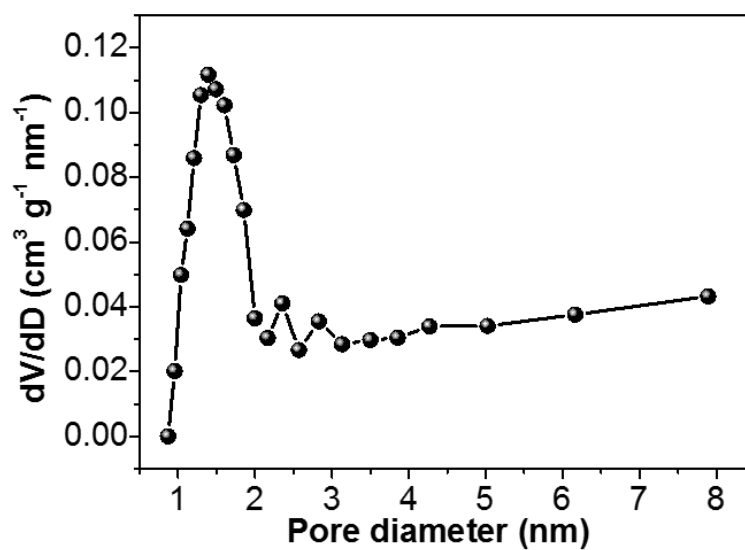

**Fig. S7** The pore size distribution curve of CNTs

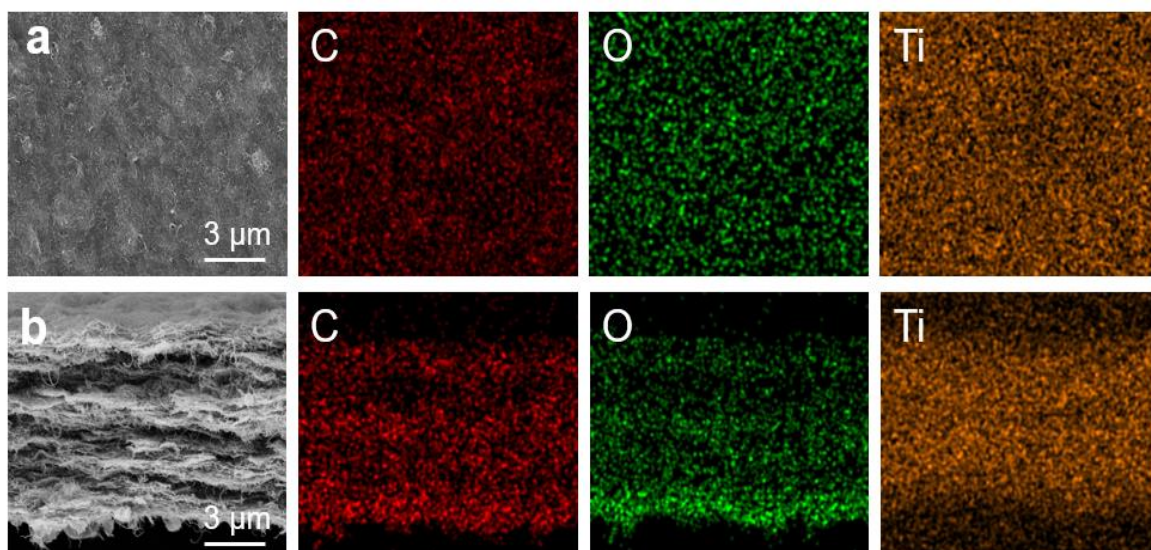

**Fig. S8** **a** Top-view SEM and EDS mapping images of  $\text{Ti}_3\text{C}_2$ -CNTs composite paper. **b** Cross-sectional SEM and EDS mapping images of  $\text{Ti}_3\text{C}_2$ -CNTs composite paper

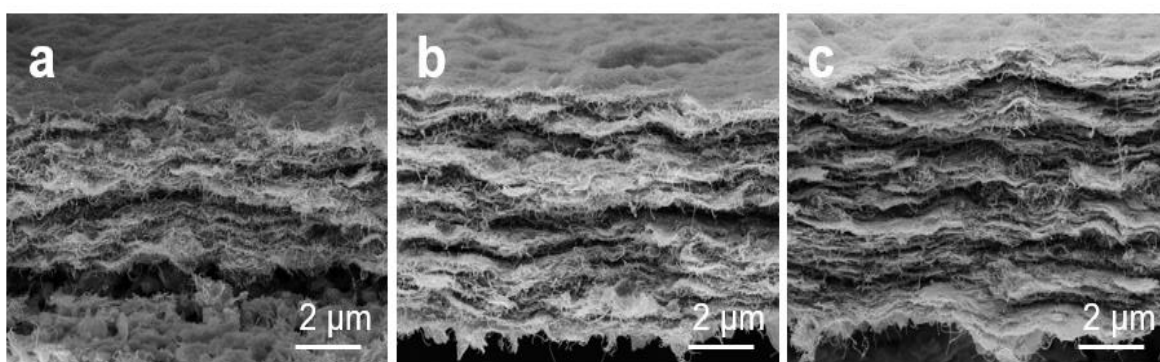

**Fig. S9** Cross-sectional SEM images of **a** CM-5, **b** CM-10, and **c** CM-15

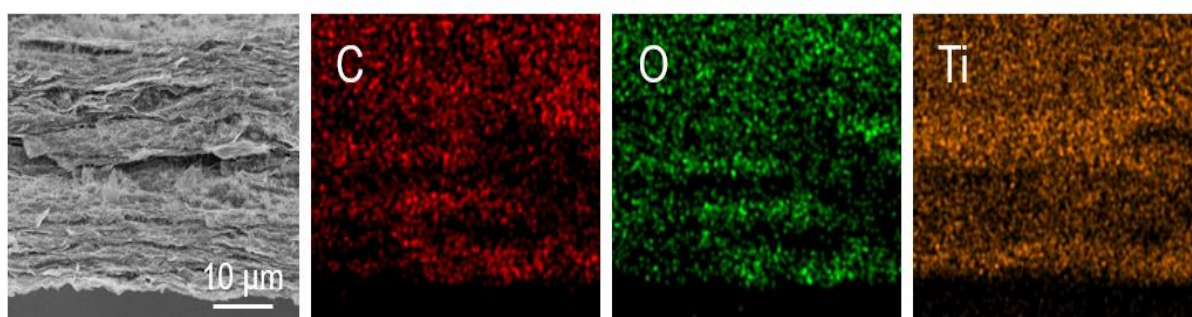

**Fig. S10** Cross-sectional SEM and EDS mapping images of the free-standing CMC mixture composite paper

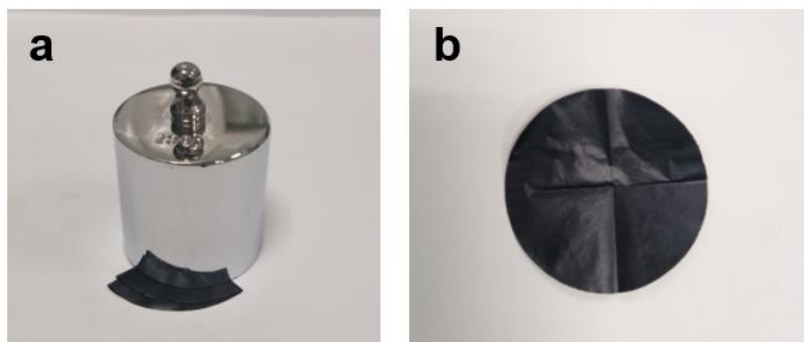

**Fig. S11** **a** CMC GS composite paper was pressed with a weight of 200 g. **b** The CMC GS composite paper was not broken or cracked after pressed

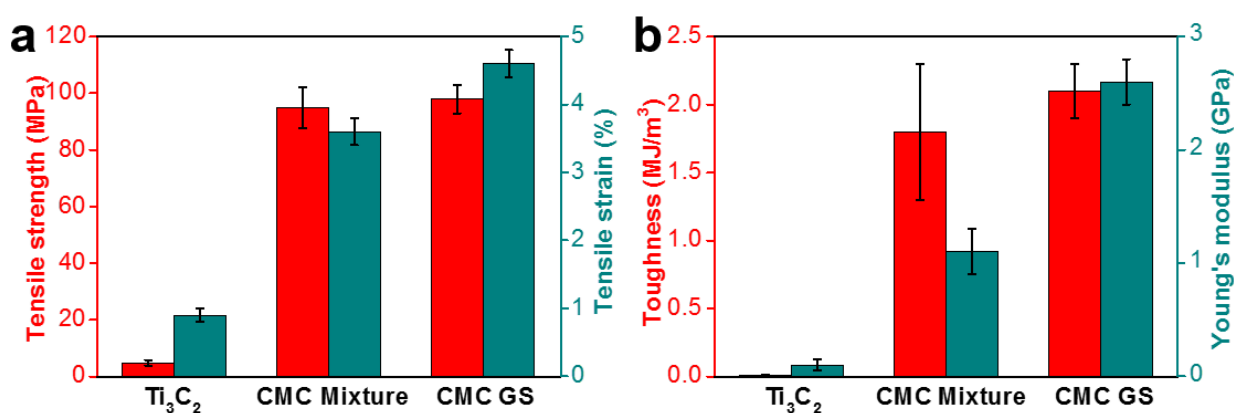

**Fig. S12** **a** The tensile strengths and tensile strains of pure Ti<sub>3</sub>C<sub>2</sub>, CMC mixture, and CMC composite paper. **b** The toughness and young's modulus of pure Ti<sub>3</sub>C<sub>2</sub>, CMC mixture, and CMC composite paper

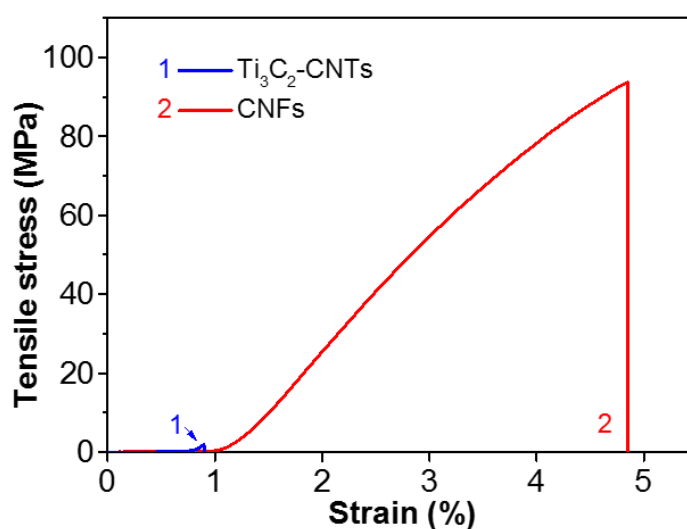

**Fig. S13** Tensile stress-strain curves of the Ti<sub>3</sub>C<sub>2</sub>-CNTs composite paper and the pure CNFs paper

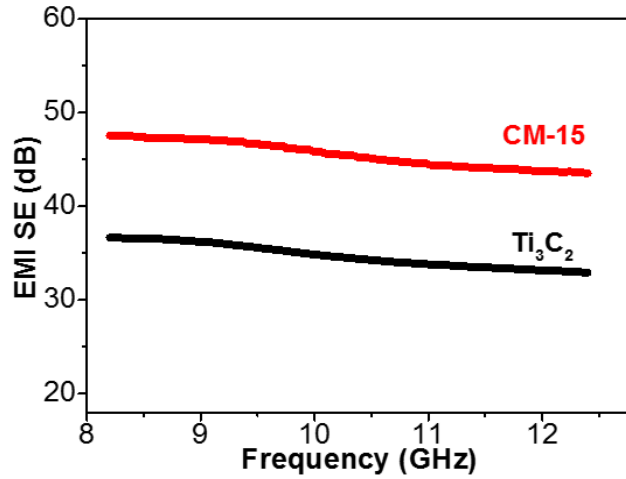

Fig. S14 The EMI SE of pure Ti<sub>3</sub>C<sub>2</sub> paper and single-layered CM in the X-band region

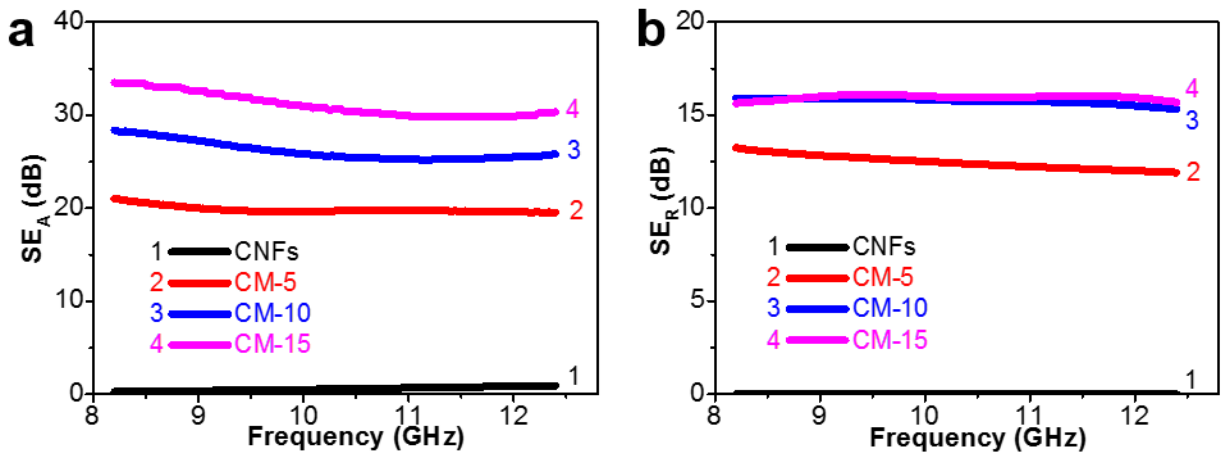

Fig. S15 a SE<sub>A</sub> and b SE<sub>R</sub> of single-layered TONFC, CM-5, CM-10, and CM-15 in the X-band region

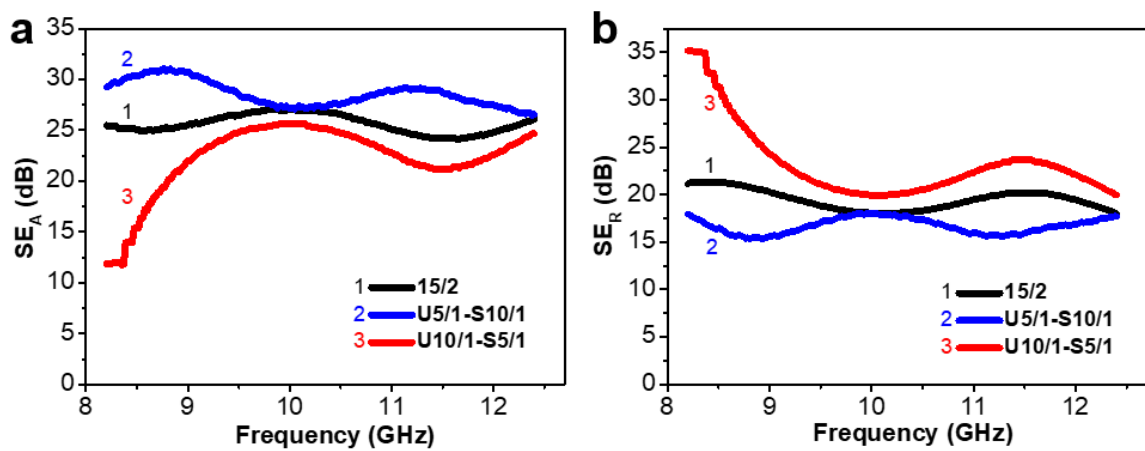

Fig. S16 a SE<sub>A</sub>, and b SE<sub>R</sub> of evenly distributed CM composite paper and two-layered CM composite paper with different gradient structures in the X-band

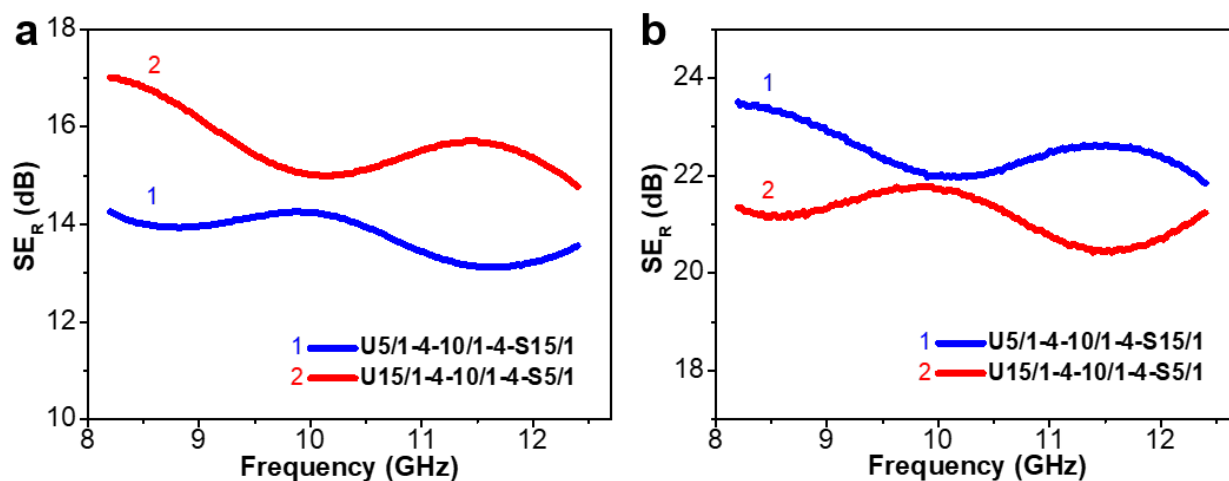

Fig. S17 a  $SE_R$ , and b  $SE_A$  of CMC GS composite paper with different gradient structures

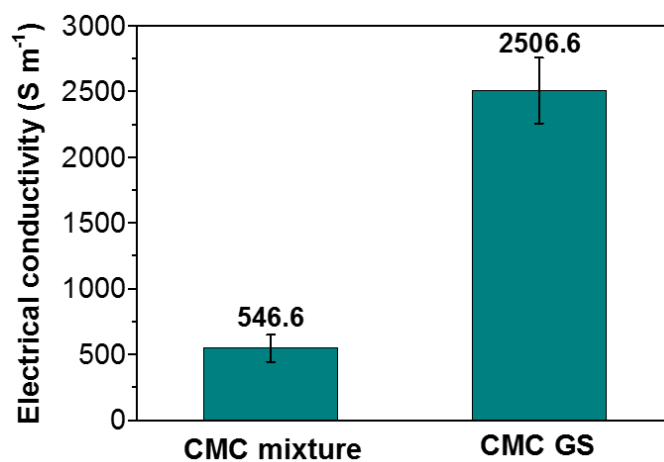

Fig. S18 The electrical conductivity of CMC mixture paper and CMC GS composite paper.

Table S1 The mechanical properties of different samples

| Sample                               | Tensile strength (MPa) | Fracture strain (%) | Toughness (MJ m <sup>-3</sup> ) | Young's modulus (GPa) |
|--------------------------------------|------------------------|---------------------|---------------------------------|-----------------------|
| Ti <sub>3</sub> C <sub>2</sub> MXene | 4.9 ± 1.0              | 0.9 ± 0.1           | 0.010 ± 0.005                   | 0.10 ± 0.05           |
| Ti <sub>3</sub> C <sub>2</sub> -CNTs | 2.4 ± 1.3              | 0.8 ± 0.4           | 0.0019 ± 0.0004                 | 0.25 ± 0.1            |
| CNFs                                 | 95.7 ± 13.7            | 5.1 ± 1.7           | 1.8 ± 0.5                       | 2.5 ± 0.1             |
| CMC mixture                          | 94.9 ± 7.4             | 3.6 ± 0.2           | 1.8 ± 0.5                       | 1.1 ± 0.2             |
| CMC GS                               | 97.9 ± 5.0             | 4.6 ± 0.2           | 2.1 ± 0.2                       | 2.6 ± 0.2             |

**Table S2** Comparison of the EMI shielding performance of the CMC GS composite paper with other reported materials

| Type                | Sample | Materials                                                | Thickness (mm) | SE (dB) | SSE/t (dB cm <sup>2</sup> g <sup>-1</sup> ) | Refs. |
|---------------------|--------|----------------------------------------------------------|----------------|---------|---------------------------------------------|-------|
| <b>Metal-based</b>  | 1      | Ag NW                                                    | 0.5            | 35      | 2416                                        | [S1]  |
|                     | 2      | Cu foil                                                  | 0.0001         | 70      | 7812                                        | [S2]  |
|                     | 3      | Ni fiber/PES                                             | 2.85           | 58      | 109                                         | [S3]  |
|                     | 4      | Ni filaments/PES                                         | 2.85           | 87      | 165                                         | [S4]  |
|                     | 5      | CuNi-CNT                                                 | 1.5            | 54.6    | 1580                                        | [S5]  |
|                     | 6      | CuNi foam                                                | 1.5            | 25      | 690                                         | [S5]  |
|                     | 7      | Copper                                                   | 3.1            | 90      | 32                                          | [S3]  |
| <b>Carbon-based</b> | 8      | Graphene/PDMS                                            | 0.1            | 20      | 3330                                        | [S6]  |
|                     | 9      | rGO                                                      | 2.5            | 45.1    | 692                                         | [S7]  |
|                     | 10     | rGO/PS                                                   | 2              | 29      | 258                                         | [S8]  |
|                     | 11     | rGO/Fe <sub>3</sub> O <sub>4</sub>                       | 0.3            | 24      | 1033                                        | [S4]  |
|                     | 12     | rGO/PEDOT                                                | 0.8            | 70      | 841                                         | [S9]  |
|                     | 13     | MWCNT/WPU                                                | 0.1            | 21.1    | 5410                                        | [S10] |
|                     | 14     | MWCNT/PC                                                 | 2.1            | 39      | 164                                         | [S11] |
|                     | 15     | MWCNT/ABS                                                | 1.1            | 50      | 433                                         | [S12] |
|                     | 16     | MWCNT/PS                                                 | 2              | 30      | 285                                         | [S13] |
|                     | 17     | SWCNT/PS                                                 | 1.2            | 18.5    | 275                                         | [S14] |
|                     | 18     | SWCNT/epoxy                                              | 2              | 25      | 72                                          | [S15] |
|                     | 19     | Carbon foam                                              | 0.2            | 40      | 1250                                        | [S16] |
|                     | 20     | Carbon/PN resin                                          | 0.2            | 51.2    | 1705                                        | [S17] |
|                     | 21     | CB/ABS                                                   | 1.1            | 20      | 190                                         | [S12] |
|                     | 22     | CB/EPDM                                                  | 2              | 18      | 15                                          | [S18] |
| <b>MXene-based</b>  | 23     | Ti <sub>3</sub> C <sub>2</sub> T <sub>x</sub> /CNFs      | 0.047          | 24      | 2647                                        | [S19] |
|                     | 24     | Ti <sub>3</sub> C <sub>2</sub> T <sub>x</sub> /rGO/epoxy | 2              | 56.4    | 9400                                        | [S20] |
| <b>This work</b>    | 25     | CMC mixture                                              | 0.038          | 23.4    | 5219                                        |       |
|                     | 26     | CMC GS-1                                                 | 0.038          | 37.7    | 7874                                        |       |
|                     | 27     | CMC GS-2                                                 | 0.038          | 38.4    | 8020                                        |       |

NW: nanowire; PES: polyethersulfone; CNT: carbon nanotube; PDMS: poly(dimethyl siloxane); rGO: reduced graphene oxide; MWCNT: multi-walled carbon nanotube; SWCNT: single-walled carbon nanotube; PS: polystyrene; WPU: water-borne polyurethane; CNFs: cellulose nanofibers; CMC GS-1: U5/1-4-10/1-4-S15/1; CMC GS-2: U15/1-4-10/1-4-S5/1

## Supplementary References

- [S1] J. Ma, K. Wang, M. Zhan, A comparative study of structure and electromagnetic interference shielding performance for silver nanostructure hybrid polyimide foams. *RSC Adv.* **5**(80), 65283-65296 (2015). <https://doi.org/10.1039/c5ra09507g>
- [S2] F. Shahzad, M. Alhabeab, C.B. Hatter, B. Anasori, S.M. Hong, C.M. Koo, Y. Gogotsi,



- Electromagnetic interference shielding with 2D transition metal carbides (MXenes). *Science* **353**(6304), 1137-1140 (2016). <https://doi.org/10.1126/science.aag2421>
- [S3] X.P. Shui, D.D.L. Chung, Nickel filament polymer-matrix composites with low surface impedance and high electromagnetic interference shielding effectiveness. *J. Electron. Mater.* **26**(8), 928-934 (1997). <https://doi.org/10.1007/s11664-997-0276-4>
- [S4] W.-L. Song, X.-T. Guan, L.-Z. Fan, W.-Q. Cao, C.-Y. Wang, Q.-L. Zhao, M.-S. Cao, Magnetic and conductive graphene papers toward thin layers of effective electromagnetic shielding. *J. Mater. Chem. A* **3**(5), 2097-2107 (2015). <https://doi.org/10.1039/c4ta05939e>
- [S5] K. Ji, H. Zhao, J. Zhang, J. Chen, Z. Dai, Fabrication and electromagnetic interference shielding performance of open-cell foam of a cu-ni alloy integrated with CNTs. *Appl. Surf. Sci.* **311**(351-356 (2014). <https://doi.org/10.1016/j.apsusc.2014.05.067>
- [S6] Z. Chen, C. Xu, C. Ma, W. Ren, H.-M. Cheng, Lightweight and flexible graphene foam composites for high-performance electromagnetic interference shielding. *Adv. Mater.* **25**(9), 1296-1300 (2013). <https://doi.org/10.1002/adma.201204196>
- [S7] D.-X. Yan, H. Pang, B. Li, R. Vajtai, L. Xu, P.-G. Ren, J.-H. Wang, Z.-M. Li, Structured reduced graphene oxide/polymer composites for ultra-efficient electromagnetic interference shielding. *Adv. Funct. Mater.* **25**(4), 559-566 (2015). <https://doi.org/10.1002/adfm.201403809>
- [S8] D.-X. Yan, P.-G. Ren, H. Pang, Q. Fu, M.-B. Yang, Z.-M. Li, Efficient electromagnetic interference shielding of lightweight graphene/polystyrene composite. *J. Mater. Chem.* **22**(36), 18772-18774 (2012). <https://doi.org/10.1039/c2jm32692b>
- [S9] N. Agnihotri, K. Chakrabarti, A. De, Highly efficient electromagnetic interference shielding using graphite nanoplatelet/poly(3,4-ethylenedioxythiophene)-poly(styrenesulfonate) composites with enhanced thermal conductivity. *RSC Adv.* **5**(54), 43765-43771 (2015). <https://doi.org/10.1039/c4ra15674a>
- [S10] Z. Zeng, H. Jin, M. Chen, W. Li, L. Zhou, Z. Zhang, Lightweight and anisotropic porous MWCNT/WPU composites for ultrahigh performance electromagnetic interference shielding. *Adv. Funct. Mater.* **26**(2), 303-310 (2016). <https://doi.org/10.1002/adfm.201503579>
- [S11] S. Pande, A. Chaudhary, D. Patel, B.P. Singh, R.B. Mathur, Mechanical and electrical properties of multiwall carbon nanotube/polycarbonate composites for electrostatic discharge and electromagnetic interference shielding applications. *RSC Adv.* **4**(27), 13839-13849 (2014). <https://doi.org/10.1039/c3ra47387b>
- [S12] M.H. Al-Saleh, W.H. Saadeh, U. Sundararaj, EMI shielding effectiveness of carbon based nanostructured polymeric materials: A comparative study. *Carbon* **60**, 146-156 (2013).

<https://doi.org/10.1016/j.carbon.2013.04.008>

- [S13] M. Arjmand, T. Apperley, M. Okoniewski, U. Sundararaj, Comparative study of electromagnetic interference shielding properties of injection molded versus compression molded multi-walled carbon nanotube/polystyrene composites. *Carbon* **50**(14), 5126-5134 (2012). <https://doi.org/10.1016/j.carbon.2012.06.053>
- [S14] Y.L. Yang, M.C. Gupta, Novel carbon nanotube-polystyrene foam composites for electromagnetic interference shielding. *Nano Lett.* **5**(11), 2131-2134 (2005). <https://doi.org/10.1021/nl051375r>
- [S15] Y. Huang, N. Li, Y. Ma, D. Feng, F. Li et al., The influence of single-walled carbon nanotube structure on the electromagnetic interference shielding efficiency of its epoxy composites. *Carbon* **45**(8), 1614-1621 (2007). <https://doi.org/10.1016/j.carbon.2007.04.016>
- [S16] F. Moglie, D. Micheli, S. Laurenzi, M. Marchetti, V.M. Primiani, Electromagnetic shielding performance of carbon foams. *Carbon* **50**(5), 1972-1980 (2012). <https://doi.org/10.1016/j.carbon.2011.12.053>
- [S17] L. Zhang, M. Liu, S. Roy, E.K. Chu, K.Y. See, X. Hu, Phthalonitrile-based carbon foam with high specific mechanical strength and superior electromagnetic interference shielding performance. *ACS Appl. Mater. Interfaces* **8**(11), 7422-7430 (2016). <https://doi.org/10.1021/acsami.5b12072>
- [S18] P. Ghosh, A. Chakrabarti, Conducting carbon black filled edpm vulcanizates: Assessment of dependence of physical and mechanical properties and conducting character on variation of filler loading. *Eur. Polym. J.* **36**(5), 1043-1054 (2000). [https://doi.org/10.1016/s0014-3057\(99\)00157-3](https://doi.org/10.1016/s0014-3057(99)00157-3)
- [S19] W.-T. Cao, F.-F. Chen, Y.-J. Zhu, Y.-G. Zhang, Y.-Y. Jiang, M.-G. Ma, F. Chen, Binary strengthening and toughening of MXene/cellulose nanofiber composite paper with nacre-inspired structure and superior electromagnetic interference shielding properties. *ACS Nano* **12**(5), 4583-4593 (2018). <https://doi.org/10.1021/acsnano.8b00997>
- [S20] S. Zhao, H.-B. Zhang, J.-Q. Luo, Q.-W. Wang, B. Xu, S. Hong, Z.-Z. Yu, Highly electrically conductive three-dimensional  $Ti_3C_2T_x$  mxene/reduced graphene oxide hybrid aerogels with excellent electromagnetic interference shielding performances. *ACS Nano* **12**(11), 11193-11202 (2018). <https://doi.org/10.1021/acsnano.8b05739>
